# Supplementary material for: Sleep Irregularity and Subclinical Markers of Cardiovascular Disease: The Multi‐Ethnic Study of Atherosclerosis
Source: PubMed Central journal article supplement — J Am Heart Assoc. 2023 Feb 15;12(4):e027361. doi: 10.1161/JAHA.122.027361 (PMC10111477; doi:10.1161/jaha.122.027361), 2023-02-15
Supplement: JAH3-12-e027361-s001.pdf [file JAH3-12-e027361-s001.pdf]

# **Supplemental Material**

**Table S1. MESA Sleep participant characteristics by categories of sleep timing regularity (N=2032)**

|                                         | <b>Sleep Timing Regularity</b>                      |                         |                       |                       |                   |
|-----------------------------------------|-----------------------------------------------------|-------------------------|-----------------------|-----------------------|-------------------|
|                                         | <i>(Nightly within- Person Standard Deviations)</i> |                         |                       |                       |                   |
|                                         | <b>Overall</b>                                      | $\leq 30$ mins<br>n=420 | 31 – 60 mins<br>n=713 | 61 – 90 mins<br>n=443 | >90 mins<br>n=456 |
| <b>Demographics</b>                     |                                                     |                         |                       |                       |                   |
| Female sex, n (%)                       | 1090 (53.6)                                         | 219 (52.1)              | 402 (56.4)            | 237 (53.5)            | 232 (50.9)        |
| <b>Race-ethnicity, n (%)</b>            |                                                     |                         |                       |                       |                   |
| White                                   | 770 (37.9)                                          | 217 (51.7)              | 282 (39.6)            | 145 (32.7)            | 126 (27.6)        |
| Chinese-American                        | 226 (11.1)                                          | 34 (8.1)                | 84 (11.8)             | 58 (13.1)             | 50 (11.0)         |
| Black, African-American                 | 561 (27.6)                                          | 66 (15.7)               | 176 (24.7)            | 140 (31.6)            | 179 (39.3)        |
| Hispanic                                | 475 (23.4)                                          | 103 (24.5)              | 171 (24.0)            | 100 (22.6)            | 101 (22.1)        |
| <b>Education, n (%)</b>                 |                                                     |                         |                       |                       |                   |
| < HS grad                               | 613 (30.2)                                          | 129 (30.7)              | 229 (32.1)            | 124 (28.0)            | 131 (28.7)        |
| Some college                            | 615 (30.3)                                          | 118 (28.1)              | 206 (28.9)            | 135 (30.5)            | 156 (34.2)        |
| College graduate plus                   | 800 (39.4)                                          | 173 (41.2)              | 277 (38.8)            | 182 (41.1)            | 168 (36.8)        |
| <b>Avg. Yearly Income*</b>              |                                                     |                         |                       |                       |                   |
| <\$20,000                               | 383 (18.8)                                          | 73 (17.4)               | 118 (16.5)            | 92 (20.8)             | 100 (21.9)        |
| \$20,000 - <\$50,000                    | 502 (24.7)                                          | 102 (24.3)              | 192 (26.9)            | 104 (23.5)            | 104 (22.8)        |
| $\geq$ \$50,000                         | 1086 (53.4)                                         | 233 (55.5)              | 379 (53.2)            | 242 (54.6)            | 232 (50.9)        |
| <b>Work Schedule, n (%)</b>             |                                                     |                         |                       |                       |                   |
| No Work                                 | 1148 (56.5)                                         | 266 (63.3)              | 404 (56.7)            | 228 (51.5)            | 250 (54.8)        |
| Day shift                               | 617 (30.4)                                          | 115 (27.4)              | 229 (32.1)            | 150 (33.9)            | 123 (27.0)        |
| Other shift                             | 246 (12.1)                                          | 37 (8.8)                | 72 (10.1)             | 60 (13.5)             | 77 (16.9)         |
| <b>Lifestyle characteristics</b>        |                                                     |                         |                       |                       |                   |
| Current Smoker, n (%)*                  | 142 (7.0)                                           | 16 (3.8)                | 42 (5.9)              | 32 (7.2)              | 52 (11.4)         |
| Current Alcohol Consumer, n (%)*        | 881 (43.4)                                          | 181 (43.1)              | 316 (44.3)            | 200 (45.1)            | 184 (40.4)        |
| MVPA, MET mins/week*                    | 5380 $\pm$ 6220                                     | 4760 $\pm$ 4230         | 5600 $\pm$ 6200       | 5790 $\pm$ 8230       | 5190 $\pm$ 5440   |
| BMI, kg/m <sup>2</sup> *                | 28.8 $\pm$ 5.6                                      | 28.2 $\pm$ 5.2          | 28.7 $\pm$ 5.5        | 28.7 $\pm$ 5.4        | 29.6 $\pm$ 6.0    |
| <b>Cardiovascular risk factors</b>      |                                                     |                         |                       |                       |                   |
| Systolic blood pressure, mm Hg*         | 123.0 $\pm$ 20.0                                    | 124.0 $\pm$ 20.2        | 121.0 $\pm$ 18.4      | 124.0 $\pm$ 18.9      | 125.0 $\pm$ 22.9  |
| Diastolic blood pressure, mm Hg*        | 68.3 $\pm$ 9.8                                      | 66.9 $\pm$ 9.7          | 67.3 $\pm$ 9.4        | 69.6 $\pm$ 9.3        | 70.0 $\pm$ 10.7   |
| Anti-hypertensive medication use, n (%) | 1090 (53.6)                                         | 224 (53.3)              | 367 (51.5)            | 239 (54.0)            | 260 (57.0)        |
| Statin medication use, n (%)            | 775 (38.1)                                          | 182 (43.3)              | 252 (35.3)            | 166 (37.5)            | 175 (38.4)        |
| LDL-C, mg/dL*                           | 106.0 $\pm$ 32.4                                    | 102.0 $\pm$ 30.6        | 109.0 $\pm$ 32.4      | 108.0 $\pm$ 32.4      | 105.0 $\pm$ 33.7  |

|                                        |             |             |             |             |             |
|----------------------------------------|-------------|-------------|-------------|-------------|-------------|
| HDL-C, mg/dL*                          | 55.6 ± 16.5 | 54.9 ± 14.9 | 56.5 ± 16.6 | 56.4 ± 17.9 | 54.2 ± 16.1 |
| Prevalent diabetes, n (%)*             | 397 (19.5)  | 64 (15.2)   | 121 (17.0)  | 86 (19.4)   | 126 (27.6)  |
| Severe obstructive sleep apnea, n (%)* | 386 (19.0)  | 67 (16.0)   | 120 (16.8)  | 91 (20.5)   | 108 (23.7)  |
| Average sleep fragmentation            | 20.2 ± 7.0  | 18.9 ± 6.6  | 19.8 ± 6.9  | 21.0 ± 7.1  | 21.1 ± 7.1  |

---

Data presented as mean ± SD unless specified; HS: high school; MVPA: moderate to vigorous intensity physical activity; BMI: Body Mass Index; LDL-C: low density lipoprotein cholesterol; HDL-C: high density lipoprotein cholesterol.

---

**Table S2. Sleep duration regularity and associations with subclinical markers of CVD excluding participants with prevalent Cardiovascular Disease: The MESA Sleep Study (2010-2013)**

|                                          |             | <b>Sleep Duration Regularity</b><br>(Nightly within- Person Standard Deviations) |                          |                          |           |
|------------------------------------------|-------------|----------------------------------------------------------------------------------|--------------------------|--------------------------|-----------|
|                                          |             | ≤60 mins                                                                         | 61 – 90 mins             | 91 – 120 mins            | >120 mins |
|                                          |             | <b>Prevalence Ratio (95% Confidence Interval)</b>                                |                          |                          |           |
| <b>Coronary Artery Calcium (&gt;0)</b>   |             |                                                                                  |                          |                          |           |
| Model 3                                  | (reference) | 1.06 (0.98, 1.16)                                                                | 1.03 (0.94, 1.13)        | 1.07 (0.98, 1.18)        |           |
| <i>Model 3 - prevalent CVD</i>           | (reference) | 1.07 (0.98, 1.17)                                                                | 1.02 (0.92, 1.12)        | 1.07 (0.97, 1.18)        |           |
| <b>Coronary Artery Calcium (&gt;300)</b> |             |                                                                                  |                          |                          |           |
| Model 3                                  | (reference) | 1.26 (0.99, 1.59)                                                                | <b>1.32 (1.05, 1.67)</b> | <b>1.33 (1.03, 1.71)</b> |           |
| <i>Model 3 - prevalent CVD</i>           | (reference) | <b>1.12 (1.01, 1.24)</b>                                                         | 1.06 (0.95, 1.19)        | <b>1.13 (1.01, 1.26)</b> |           |
| <b>Carotid plaque</b>                    |             |                                                                                  |                          |                          |           |
| Model 3                                  | (reference) | <b>1.10 (1.01, 1.20)</b>                                                         | 1.09 (0.99, 1.20)        | 1.09 (0.99, 1.21)        |           |
| <i>Model 3 - prevalent CVD</i>           | (reference) | <b>1.09 (1.00, 1.20)</b>                                                         | 1.09 (0.99, 1.21)        | 1.08 (0.97, 1.20)        |           |
| <b>Carotid-IMT (&gt;0.9)</b>             |             |                                                                                  |                          |                          |           |
| Model 3                                  | (reference) | 0.99 (0.83, 1.18)                                                                | 0.99 (0.83, 1.18)        | 1.03 (0.85, 1.25)        |           |
| <i>Model 3 - prevalent CVD</i>           | (reference) | 0.98 (0.82, 1.18)                                                                | 0.94 (0.78, 1.14)        | 1.06 (0.87, 1.29)        |           |
| <b>Ankle Brachial Index (&lt;0.9)</b>    |             |                                                                                  |                          |                          |           |
| Model 3                                  | (reference) | 1.50 (0.86, 2.59)                                                                | 1.62 (0.98, 2.70)        | <b>1.75 (1.03, 2.95)</b> |           |
| <i>Model 3 - prevalent CVD</i>           | (reference) | 1.12 (0.62, 2.04)                                                                | 1.51 (0.90, 2.54)        | 1.63 (0.95, 2.78)        |           |

CAC n=1431; Carotid plaque n=1464; Carotid-IMT n=1415; ABI n=1839; Model 1: age, sex, race/ethnicity, site; Model 2: M1+ education, income, work schedule, smoking status, alcohol consumption, physical activity, and BMI; Model 3: M2 + systolic blood pressure, diastolic blood pressure, anti-hypertension medication use, statin medication use, LDL-C, HDL-C, prevalent diabetes

**Table S3. Sleep duration regularity and associations with subclinical markers of CVD excluding participants with severe obstructive sleep apnea (OSA): The MESA Sleep Study (2010-2013)**

|                                          |             | <b>Sleep Duration Regularity</b><br>(Nightly within- Person Standard Deviations) |                          |                          |           |
|------------------------------------------|-------------|----------------------------------------------------------------------------------|--------------------------|--------------------------|-----------|
|                                          |             | ≤60 mins                                                                         | 61 – 90 mins             | 91 – 120 mins            | >120 mins |
|                                          |             | <b>Prevalence Ratio (95% Confidence Interval)</b>                                |                          |                          |           |
| <b>Coronary Artery Calcium (&gt;0)</b>   |             |                                                                                  |                          |                          |           |
| Model 3                                  | (reference) | 1.06 (0.98, 1.16)                                                                | 1.03 (0.94, 1.13)        | 1.07 (0.98, 1.18)        |           |
| <i>Model 3 – severe OSA</i>              | (reference) | 1.07 (0.97, 1.19)                                                                | 1.08 (0.97, 1.20)        | <b>1.14 (1.02, 1.27)</b> |           |
| <b>Coronary Artery Calcium (&gt;300)</b> |             |                                                                                  |                          |                          |           |
| Model 3                                  | (reference) | 1.26 (0.99, 1.59)                                                                | <b>1.32 (1.05, 1.67)</b> | <b>1.33 (1.03, 1.71)</b> |           |
| <i>Model 3 – severe OSA</i>              | (reference) | <b>1.13 (1.01, 1.26)</b>                                                         | <b>1.18 (1.05, 1.32)</b> | <b>1.18 (1.04, 1.34)</b> |           |
| <b>Carotid plaque</b>                    |             |                                                                                  |                          |                          |           |
| Model 3                                  | (reference) | <b>1.10 (1.01, 1.20)</b>                                                         | 1.09 (0.99, 1.20)        | 1.09 (0.99, 1.21)        |           |
| <i>Model 3 – severe OSA</i>              | (reference) | <b>1.12 (1.02, 1.24)</b>                                                         | <b>1.14 (1.03, 1.26)</b> | 1.09 (0.97, 1.22)        |           |
| <b>Carotid-IMT (&gt;0.9)</b>             |             |                                                                                  |                          |                          |           |
| Model 3                                  | (reference) | 0.99 (0.83, 1.18)                                                                | 0.99 (0.83, 1.18)        | 1.03 (0.85, 1.25)        |           |
| <i>Model 3 – severe OSA</i>              | (reference) | 1.01 (0.83, 1.22)                                                                | 1.00 (0.82, 1.22)        | 1.03 (0.82, 1.29)        |           |
| <b>Ankle Brachial Index (&lt;0.9)</b>    |             |                                                                                  |                          |                          |           |
| Model 3                                  | (reference) | 1.50 (0.86, 2.59)                                                                | 1.62 (0.98, 2.70)        | <b>1.75 (1.03, 2.95)</b> |           |
| <i>Model 3 – severe OSA</i>              | (reference) | 1.68 (0.92, 3.07)                                                                | 1.67 (0.93, 3.02)        | 1.83 (0.98, 3.42)        |           |

CAC n=1235; Carotid plaque n=1272; Carotid-IMT n=1233; ABI n=1565; Model 1: age, sex, race/ethnicity, site; Model 2: M1+ education, income, work schedule, smoking status, alcohol consumption, physical activity, and BMI; Model 3: M2 + systolic blood pressure, diastolic blood pressure, anti-hypertension medication use, statin medication use, LDL-C, HDL-C, prevalent diabetes; OSA: Obstructive Sleep Apnea

**Table S4. Sleep duration regularity and associations with subclinical markers of CVD with additional adjustment for season of actigraphy collection: The MESA Sleep Study (2010-2013)**

|                                          |             | <b>Sleep Duration Regularity</b><br>(Nightly within- Person Standard Deviations) |                          |                          |           |
|------------------------------------------|-------------|----------------------------------------------------------------------------------|--------------------------|--------------------------|-----------|
|                                          |             | ≤60 mins                                                                         | 61 – 90 mins             | 91 – 120 mins            | >120 mins |
|                                          |             | <b>Prevalence Ratio (95% Confidence Interval)</b>                                |                          |                          |           |
| <b>Coronary Artery Calcium (&gt;0)</b>   |             |                                                                                  |                          |                          |           |
| Model 3                                  | (reference) | 1.06 (0.98, 1.16)                                                                | 1.03 (0.94, 1.13)        | 1.07 (0.98, 1.18)        |           |
| <i>Model 3 + season</i>                  | (reference) | 1.06 (0.97, 1.16)                                                                | 1.03 (0.94, 1.13)        | 1.07 (0.98, 1.18)        |           |
| <b>Coronary Artery Calcium (&gt;300)</b> |             |                                                                                  |                          |                          |           |
| Model 3                                  | (reference) | 1.26 (0.99, 1.59)                                                                | <b>1.32 (1.05, 1.67)</b> | <b>1.33 (1.03, 1.71)</b> |           |
| <i>Model 3 + season</i>                  | (reference) | <b>1.10 (1.00, 1.22)</b>                                                         | 1.10 (0.99, 1.22)        | <b>1.14 (1.02, 1.26)</b> |           |
| <b>Carotid plaque</b>                    |             |                                                                                  |                          |                          |           |
| Model 3                                  | (reference) | <b>1.10 (1.01, 1.20)</b>                                                         | 1.09 (0.99, 1.20)        | 1.09 (0.99, 1.21)        |           |
| <i>Model 3 + season</i>                  | (reference) | <b>1.10 (1.01, 1.20)</b>                                                         | 1.09 (0.99, 1.20)        | 1.09 (0.99, 1.21)        |           |
| <b>Carotid-IMT (&gt;0.9)</b>             |             |                                                                                  |                          |                          |           |
| Model 3                                  | (reference) | 0.99 (0.83, 1.18)                                                                | 0.99 (0.83, 1.18)        | 1.03 (0.85, 1.25)        |           |
| <i>Model 3 + season</i>                  | (reference) | 1.00 (0.84, 1.19)                                                                | 0.99 (0.83, 1.19)        | 1.04 (0.86, 1.26)        |           |
| <b>Ankle Brachial Index (&lt;0.9)</b>    |             |                                                                                  |                          |                          |           |
| Model 3                                  | (reference) | 1.50 (0.86, 2.59)                                                                | 1.62 (0.98, 2.70)        | <b>1.75 (1.03, 2.95)</b> |           |
| <i>Model 3 + season</i>                  | (reference) | 1.47 (0.85, 2.55)                                                                | 1.61 (0.97, 2.66)        | <b>1.72 (1.02, 2.92)</b> |           |

CAC n=1549; Carotid plaque n=1588; Carotid-IMT n=1535; ABI n=1989; Model 1: age, sex, race/ethnicity, site; Model 2: M1+ education, income, work schedule, smoking status, alcohol consumption, physical activity, and BMI; Model 3: M2 + systolic blood pressure, diastolic blood pressure, anti-hypertension medication use, statin medication use, LDL-C, HDL-C, prevalent diabetes

**Table S5. Weekday sleep duration regularity and associations with subclinical markers of CVD: The MESA Sleep Study (2010-2013)**

| <b>Weekday Sleep Duration Regularity</b><br>(Nightly within- Person Standard Deviations) |             |                   |                          |                          |
|------------------------------------------------------------------------------------------|-------------|-------------------|--------------------------|--------------------------|
|                                                                                          | ≤60 mins    | 61 – 90 mins      | 91 – 120 mins            | >120 mins                |
| <b>Prevalence Ratio (95% Confidence Interval)</b>                                        |             |                   |                          |                          |
| <b>Coronary Artery Calcium (&gt;0)</b>                                                   |             |                   |                          |                          |
| <i>n</i> (%)                                                                             | 363 (65.5)  | 273 (65.5)        | 211 (66.1)               | 180 (69.5)               |
| Model 1                                                                                  | (reference) | 1.03 (0.94, 1.18) | 1.00 (0.91, 1.11)        | 1.05 (0.96, 1.15)        |
| Model 2                                                                                  | (reference) | 1.02 (0.94, 1.17) | 1.00 (0.90, 1.11)        | 1.02 (0.93, 1.12)        |
| Model 3                                                                                  | (reference) | 1.02 (0.94, 1.11) | 0.99 (0.89, 1.09)        | 1.01 (0.92, 1.11)        |
| <b>Coronary Artery Calcium (&gt;300)</b>                                                 |             |                   |                          |                          |
| <i>n</i> (%)                                                                             | 113 (20.4)  | 84 (20.1)         | 78 (24.4)                | 67 (25.9)                |
| Model 1                                                                                  | (reference) | 1.03 (0.94, 1.14) | 1.02 (0.91, 1.14)        | <b>1.12 (1.01, 1.25)</b> |
| Model 2                                                                                  | (reference) | 1.03 (0.94, 1.14) | 1.01 (0.90, 1.13)        | 1.10 (0.99, 1.23)        |
| Model 3                                                                                  | (reference) | 1.05 (0.95, 1.15) | 1.01 (0.90, 1.13)        | 1.08 (0.97, 1.20)        |
| <b>Carotid plaque</b>                                                                    |             |                   |                          |                          |
| <i>n</i> (%)                                                                             | 356 (64.1)  | 289 (67.5)        | 230 (69.3)               | 192 (70.3)               |
| Model 1                                                                                  | (reference) | 1.04 (0.95, 1.14) | <b>1.15 (1.05, 1.26)</b> | <b>1.12 (1.02, 1.23)</b> |
| Model 2                                                                                  | (reference) | 1.04 (0.95, 1.14) | <b>1.14 (1.04, 1.25)</b> | <b>1.10 (1.01, 1.21)</b> |
| Model 3                                                                                  | (reference) | 1.04 (0.95, 1.14) | <b>1.13 (1.03, 1.24)</b> | 1.09 (0.99, 1.20)        |
| <b>Carotid-IMT (&gt;0.9)</b>                                                             |             |                   |                          |                          |
| <i>n</i> (%)                                                                             | 183 (34.1)  | 133 (32.2)        | 119 (36.6)               | 98 (37.5)                |
| Model 1                                                                                  | (reference) | 1.16 (0.94, 1.32) | 1.03 (0.86, 1.24)        | 1.10 (0.92, 1.31)        |
| Model 2                                                                                  | (reference) | 1.10 (0.94, 1.31) | 0.99 (0.82, 1.20)        | 1.08 (0.90, 1.30)        |
| Model 3                                                                                  | (reference) | 1.08 (0.92, 1.28) | 0.95 (0.78, 1.16)        | 1.07 (0.89, 1.29)        |
| <b>Ankle Brachial Index (&lt;0.9)</b>                                                    |             |                   |                          |                          |
| <i>n</i> (%)                                                                             | 24 (3.5)    | 26 (4.8)          | 28 (6.8)                 | 25 (7.3)                 |
| Model 1                                                                                  | (reference) | 1.45 (0.87, 2.42) | <b>1.69 (1.02, 2.81)</b> | <b>1.88 (1.13, 3.12)</b> |
| Model 2                                                                                  | (reference) | 1.45 (0.86, 2.45) | 1.61 (0.97, 2.66)        | <b>1.87 (1.12, 3.10)</b> |
| Model 3                                                                                  | (reference) | 1.41 (0.83, 2.38) | 1.59 (0.95, 2.66)        | <b>1.70 (1.01, 2.85)</b> |

CAC n=1549; Carotid plaque n=1588; Carotid-IMT n=1535; ABI n=1989; Model 1: age, sex, race/ethnicity, site; Model 2: M1+ education, income, work schedule, smoking status, alcohol consumption, physical activity, and BMI; Model 3: M2 + systolic blood pressure, diastolic blood pressure, anti-hypertension medication use, statin medication use, LDL-C, HDL-C, prevalent diabetes
